# Supplementary material
Source: MDPI journal article supplement (https://www.mdpi.com/2073-4433/11/5/492)
Supplement: s1 [file s1]

## Supplementary Materials:

# Low-Cost Air Quality Sensors: One-Year Field Comparative Measurement of different Gas Sensors and Particle Counters with Reference Monitors at Tušimice Observatory

Petra Bauerová <sup>1,\*</sup>, Adriana Šindelarová <sup>1</sup>, Štěpán Rychlík <sup>2</sup>, Zbyněk Novák <sup>3</sup> and Josef Keder <sup>1</sup>

<sup>1</sup> Czech Hydrometeorological Institute, Tušimice Observatory, Tušimice 6, 432 01 Kadaň, Czech Republic; [adriana.sindelarova@chmi.cz](mailto:adriana.sindelarova@chmi.cz) (A.Š.); [josef.keder@chmi.cz](mailto:josef.keder@chmi.cz) (J.K.)

<sup>2</sup> Czech Hydrometeorological Institute, Central Ambient Air Quality Laboratories, Generála Šišky 942, 142 00 Prague, Czech Republic; [stepan.rychlik@chmi.cz](mailto:stepan.rychlik@chmi.cz)

<sup>3</sup> Envitech Bohemia s.r.o., Ovocná 34/1021, 161 00 Prague, Czech Republic; [novak@envitech-bohemia.cz](mailto:novak@envitech-bohemia.cz)

\* Correspondence: [petra.bauerova@chmi.cz](mailto:petra.bauerova@chmi.cz); Tel.: +420-474-332-668

## Supplementary tables

**Table S1.** The number of valid data (hourly average concentrations; shown in percentage) measured by pairs of different Cairclip sensors in particular months of testing period.

| Sensor type              | Sensor ID | N <sup>1</sup> | Valid data (%) in particular months |         |        |        |        |        |        |        |        |        |        |
|--------------------------|-----------|----------------|-------------------------------------|---------|--------|--------|--------|--------|--------|--------|--------|--------|--------|
|                          |           |                | 11/2017                             | 12/2017 | 1/2018 | 2/2018 | 3/2018 | 4/2018 | 5/2018 | 6/2018 | 7/2018 | 8/2018 | 9/2018 |
| Cairclip SO <sub>2</sub> | 1         | 7031           | 100.0                               | 100.0   | 94.8   | 100.0  | 80.0   | 100.0  | 90.3   | 100.0  | 100.0  | 100.0  | 81.9   |
|                          | 2         | 5383           | 26.1                                | 3.0     | 25.8   | 57.0   | 79.2   | 100.0  | 90.1   | 100.0  | 100.0  | 100.0  | 81.9   |
| Cairclip NO <sub>2</sub> | 1         | 7031           | 100.0                               | 100.0   | 94.8   | 100.0  | 80.0   | 100.0  | 90.3   | 100.0  | 100.0  | 100.0  | 81.9   |
|                          | 2         | 7031           | 100.0                               | 100.0   | 94.8   | 100.0  | 80.0   | 100.0  | 90.3   | 100.0  | 100.0  | 100.0  | 81.9   |
| Cairclip O <sub>3</sub>  | 1         | 7031           | 100.0                               | 100.0   | 94.8   | 100.0  | 80.0   | 100.0  | 90.3   | 100.0  | 100.0  | 100.0  | 81.9   |
|                          | 2         | 7031           | 100.0                               | 100.0   | 94.8   | 100.0  | 80.0   | 100.0  | 90.3   | 100.0  | 100.0  | 100.0  | 81.9   |
| Cairclip CO              | 1         | 7031           | 100.0                               | 100.0   | 94.8   | 100.0  | 80.0   | 100.0  | 90.3   | 100.0  | 100.0  | 100.0  | 81.9   |
|                          | 2         | 7031           | 100.0                               | 100.0   | 94.8   | 100.0  | 80.0   | 100.0  | 90.3   | 100.0  | 100.0  | 100.0  | 81.9   |

<sup>1</sup> N = total number of valid data (hourly average concentrations) for the whole testing period.

**Table S2.** Correlation matrix of gas concentrations (in ppb, CO in ppm) measured by different pairs of Cairclip Cairpol sensors (Cair1, Cair2) and of ambient air temperature (T in °C) and relative humidity (RH in %).<sup>1</sup>

| Sensor                | SO <sub>2</sub> Cair1 | SO <sub>2</sub> Cair2 | NO <sub>2</sub> Cair1 | NO <sub>2</sub> Cair2 | O <sub>3</sub> Cair1 | O <sub>3</sub> Cair2 | CO Cair1     | CO Cair2     | T     |
|-----------------------|-----------------------|-----------------------|-----------------------|-----------------------|----------------------|----------------------|--------------|--------------|-------|
| SO <sub>2</sub> Cair2 | 0.99                  |                       |                       |                       |                      |                      |              |              |       |
| NO <sub>2</sub> Cair1 | 1.00                  | 0.99                  |                       |                       |                      |                      |              |              |       |
| NO <sub>2</sub> Cair2 | 1.00                  | 0.99                  | 1.00                  |                       |                      |                      |              |              |       |
| O <sub>3</sub> Cair1  | 1.00                  | 0.98                  | 1.00                  | 1.00                  |                      |                      |              |              |       |
| O <sub>3</sub> Cair2  | 1.00                  | 0.99                  | 1.00                  | 1.00                  | 1.00                 |                      |              |              |       |
| CO Cair1              | 1.00                  | 0.99                  | 1.00                  | 1.00                  | 1.00                 | 1.00                 |              |              |       |
| CO Cair2              | 0.80                  | 0.83                  | 0.82                  | 0.82                  | 0.79                 | 0.81                 | 0.80         |              |       |
| T                     | <b>0.80</b>           | <b>0.86</b>           | <b>0.82</b>           | <b>0.82</b>           | <b>0.79</b>          | <b>0.80</b>          | <b>0.80</b>  | <b>0.79</b>  |       |
| RH                    | <b>-0.66</b>          | <b>-0.65</b>          | <b>-0.65</b>          | <b>-0.65</b>          | <b>-0.66</b>         | <b>-0.66</b>         | <b>-0.66</b> | <b>-0.50</b> | -0.62 |

<sup>1</sup> Spearman correlation coefficients ( $r_s$ ) are shown, all values were statistically significant at the level of  $p < 0.05$ . Correlation coefficients of different kind of gas sensors with air temperature and relative humidity are highlighted in bold. N = 5383.

**Table S3.** The number of valid data (hourly average concentrations; shown in percentage) measured by pairs of PMS7003 Plantower particle counters in particular months of testing period.

| Sensor type             | Sensor ID | N    | Valid data (%) in particular months |        |        |        |        |        |        |         |         |         |
|-------------------------|-----------|------|-------------------------------------|--------|--------|--------|--------|--------|--------|---------|---------|---------|
|                         |           |      | 3/2018                              | 4/2018 | 5/2018 | 6/2018 | 7/2018 | 8/2018 | 9/2018 | 10/2018 | 11/2018 | 12/2018 |
| <b>PMS7003</b>          | 1         | 6736 | 99.4                                | 99.3   | 90.3   | 99.6   | 99.5   | 99.1   | 81.9   | 94.9    | 92.1    | 78.4    |
| <b>PM<sub>1</sub></b>   | 2         | 6852 | 99.8                                | 99.7   | 90.5   | 99.7   | 99.9   | 99.5   | 82.8   | 96.1    | 92.2    | 89.9    |
| <b>PMS7003</b>          | 1         | 6840 | 99.5                                | 99.6   | 90.5   | 99.7   | 99.9   | 99.1   | 82.6   | 96.2    | 92.2    | 89.1    |
| <b>PM<sub>2.5</sub></b> | 2         | 6712 | 99.4                                | 98.9   | 90.5   | 99.2   | 99.2   | 98.0   | 81.1   | 94.6    | 92.2    | 78.1    |
| <b>PMS7003</b>          | 1         | 6919 | 100.0                               | 100.0  | 90.5   | 100.0  | 100.0  | 100.0  | 83.1   | 98.5    | 92.2    | 94.9    |
| <b>PM<sub>10</sub></b>  | 2         | 6922 | 99.7                                | 100.0  | 90.5   | 100.0  | 100.0  | 100.0  | 83.1   | 98.5    | 92.2    | 95.4    |

<sup>1</sup> N = total number of valid data (hourly average concentrations) for the whole testing period.

**Table S4.** The number of valid data (hourly average concentrations; shown in percentage) measured by pairs of OPC-N2 Alphasense particle counters in particular months of testing period.

| Sensor type             | Sensor ID | N    | Valid data (%) in particular months |         |         |         |        |
|-------------------------|-----------|------|-------------------------------------|---------|---------|---------|--------|
|                         |           |      | 9/2018                              | 10/2018 | 11/2018 | 12/2018 | 1/2019 |
| <b>OPC-N2</b>           | 1         | 2288 | 38.6                                | 75.0    | 100.0   | 100.0   | 100.0  |
| <b>PM<sub>1</sub></b>   | 2         | 2288 | 38.6                                | 75.0    | 100.0   | 100.0   | 100.0  |
| <b>OPC-N2</b>           | 1         | 2288 | 38.6                                | 75.0    | 100.0   | 100.0   | 100.0  |
| <b>PM<sub>2.5</sub></b> | 2         | 2072 | 18.2                                | 53.6    | 100.0   | 100.0   | 100.0  |
| <b>OPC-N2</b>           | 1         | 2072 | 18.2                                | 53.6    | 100.0   | 100.0   | 100.0  |
| <b>PM<sub>10</sub></b>  | 2         | 2071 | 17.9                                | 53.6    | 100.0   | 100.0   | 100.0  |

<sup>1</sup> N = total number of valid data (hourly average concentrations) for the whole testing period.

**Table S5.** Correlation matrix of PM mass concentrations (in  $\mu\text{g}/\text{m}^3$ ) measured by two PMS7003 Plantower particle counters (Plant1, Plant2) and of ambient air temperature (T in  $^{\circ}\text{C}$ ) and relative humidity (RH in %).<sup>1</sup>

| Sensor                         | PM <sub>1</sub> Plant1 | PM <sub>1</sub> Plant2 | PM <sub>2.5</sub> Plant1 | PM <sub>2.5</sub> Plant2 | PM <sub>10</sub> Plant1 | PM <sub>10</sub> Plant2 | T     |
|--------------------------------|------------------------|------------------------|--------------------------|--------------------------|-------------------------|-------------------------|-------|
| <b>PM<sub>1</sub> Plant2</b>   | 0.95                   |                        |                          |                          |                         |                         |       |
| <b>PM<sub>2.5</sub> Plant1</b> | 1.00                   | 0.95                   |                          |                          |                         |                         |       |
| <b>PM<sub>2.5</sub> Plant2</b> | 0.95                   | 1.00                   | 0.96                     |                          |                         |                         |       |
| <b>PM<sub>10</sub> Plant1</b>  | 0.99                   | 0.95                   | 1.00                     | 0.96                     |                         |                         |       |
| <b>PM<sub>10</sub> Plant2</b>  | 0.94                   | 0.99                   | 0.95                     | 0.99                     | 0.96                    |                         |       |
| <b>T</b>                       | <b>-0.27</b>           | <b>-0.24</b>           | <b>-0.31</b>             | <b>-0.28</b>             | <b>-0.32</b>            | <b>-0.29</b>            |       |
| <b>RH</b>                      | <b>0.48</b>            | <b>0.46</b>            | <b>0.51</b>              | <b>0.49</b>              | <b>0.52</b>             | <b>0.50</b>             | -0.69 |

<sup>1</sup> Spearman correlation coefficients ( $r_s$ ) are shown, all values were statistically significant at the level of  $p < 0.05$ . Correlation coefficients of different kind of gas sensors with air temperature and relative humidity are highlighted in bold. N = 6589.

**Table S6.** Correlation matrix of PM mass concentrations (in  $\mu\text{g}/\text{m}^3$ ) measured by two OPC-N2 Alphasense particle counters (Alpha1, Alpha2) and of ambient air temperature (TMP in  $^{\circ}\text{C}$ ) and relative humidity (RH in %).<sup>1</sup>

| Sensor                   | PM <sub>1</sub> Alpha1 | PM <sub>1</sub> Alpha2 | PM <sub>2.5</sub> Alpha1 | PM <sub>2.5</sub> Alpha2 | PM <sub>10</sub> Alpha1 | PM <sub>10</sub> Alpha2 | T     |
|--------------------------|------------------------|------------------------|--------------------------|--------------------------|-------------------------|-------------------------|-------|
| PM <sub>1</sub> Alpha2   | 0.99                   |                        |                          |                          |                         |                         |       |
| PM <sub>2.5</sub> Alpha1 | 0.99                   | 0.99                   |                          |                          |                         |                         |       |
| PM <sub>2.5</sub> Alpha2 | 0.99                   | 0.99                   | 0.99                     |                          |                         |                         |       |
| PM <sub>10</sub> Alpha1  | 0.98                   | 0.98                   | 1.00                     | 0.99                     |                         |                         |       |
| PM <sub>10</sub> Alpha2  | 0.98                   | 0.98                   | 0.99                     | 0.99                     | 0.99                    |                         |       |
| T                        | <b>-0.17</b>           | <b>-0.22</b>           | <b>-0.17</b>             | <b>-0.22</b>             | <b>-0.16</b>            | <b>-0.21</b>            |       |
| RH                       | <b>0.58</b>            | <b>0.59</b>            | <b>0.58</b>              | <b>0.60</b>              | <b>0.57</b>             | <b>0.59</b>             | -0.36 |

<sup>1</sup> Spearman correlation coefficients ( $r_s$ ) are shown, all values were statistically significant at the level of  $p < 0.05$ . Correlation coefficients of different kind of gas sensors with air temperature and relative humidity are highlighted in bold. N = 2028.

## 1. Supplementary figures

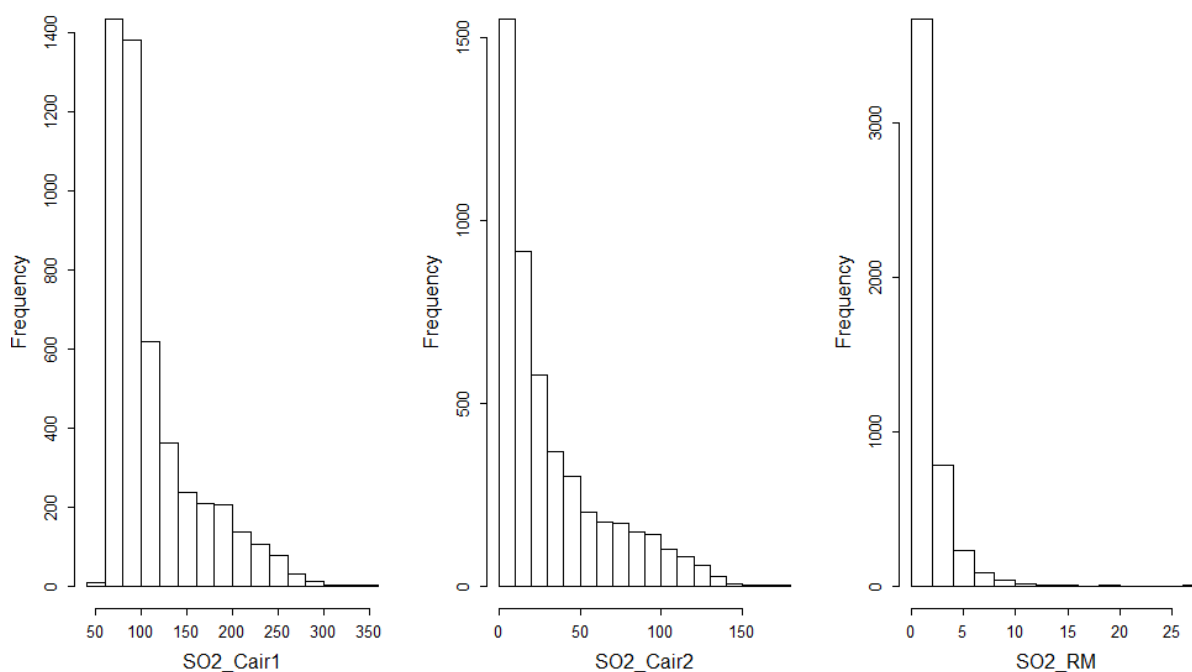

**Figure S1.** Histograms of SO<sub>2</sub> concentrations (ppb) measured by Cairclip sensors pair (Cair1, Cair2) and by corresponding reference monitor (RM).

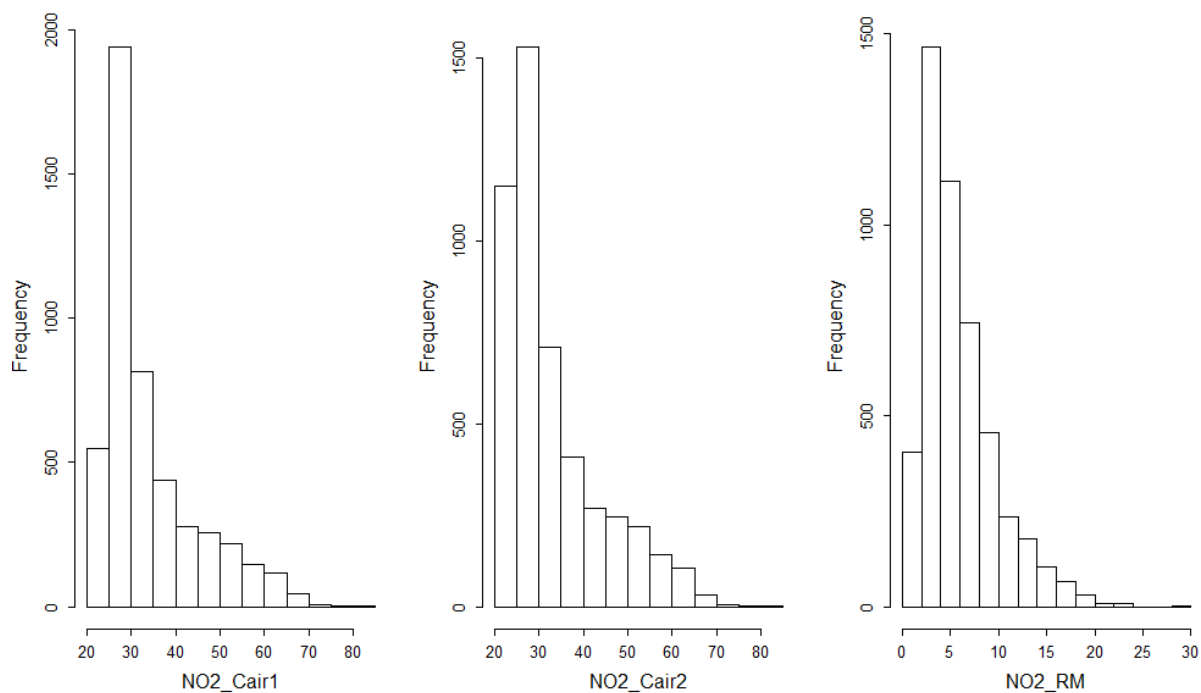

**Figure S2.** Histograms of NO<sub>2</sub> concentrations (ppb) measured by Cairclip sensors pair (Cair1, Cair2) and by corresponding reference monitor (RM).

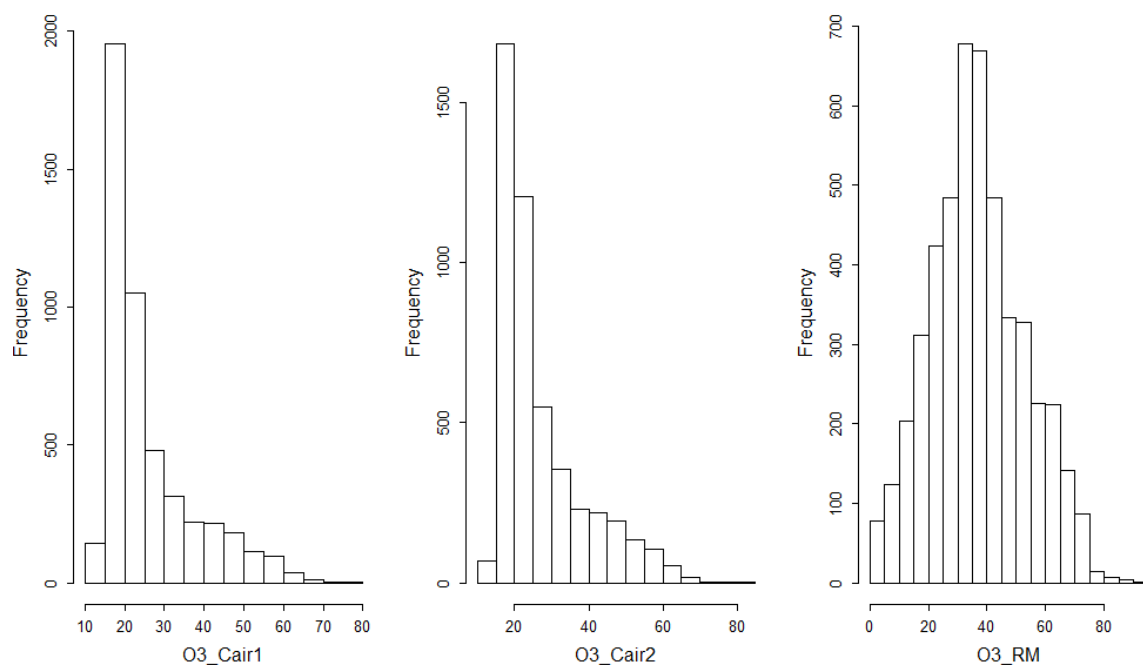

**Figure S3.** Histograms of O<sub>3</sub> concentrations (ppb) measured by Cairclip sensors pair (Cair1, Cair2) and by corresponding reference monitor (RM).

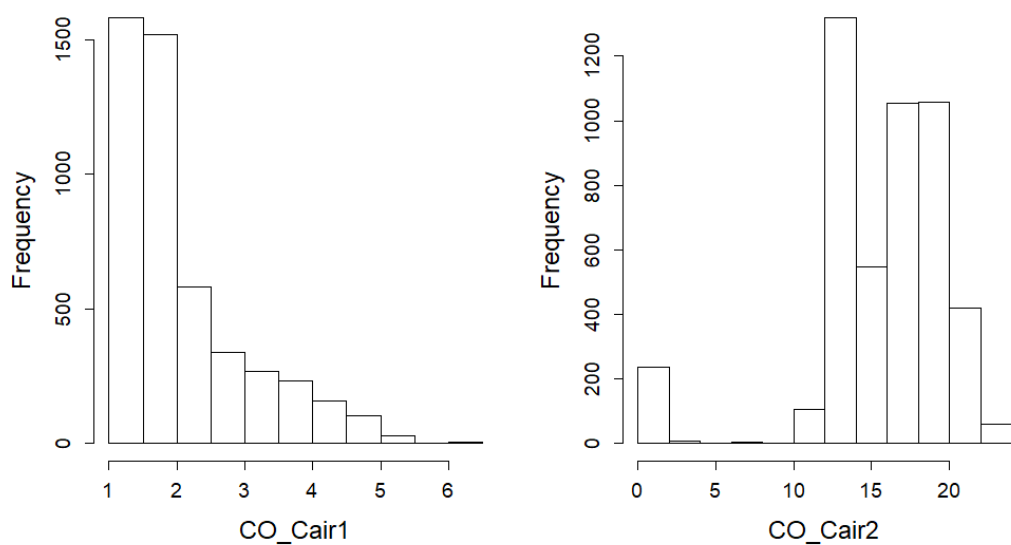

**Figure S4.** Histograms of CO concentrations (ppm) measured by Cairclip sensors pair (Cair1, Cair2). Corresponding reference monitor is not available at this measuring station.

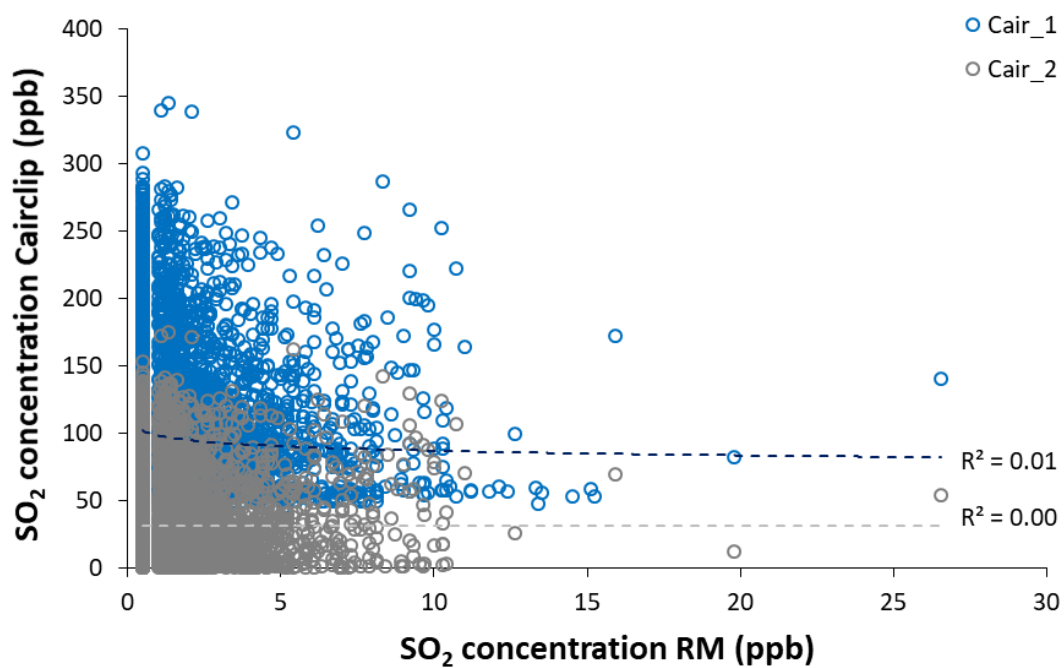

**Figure S5.** The lack of relationship between SO<sub>2</sub> concentrations measured by Cairclip sensors and by RM. Coefficient of determination ( $R^2$ ) was estimated from polynomial best-fit regression line (degree = 2).

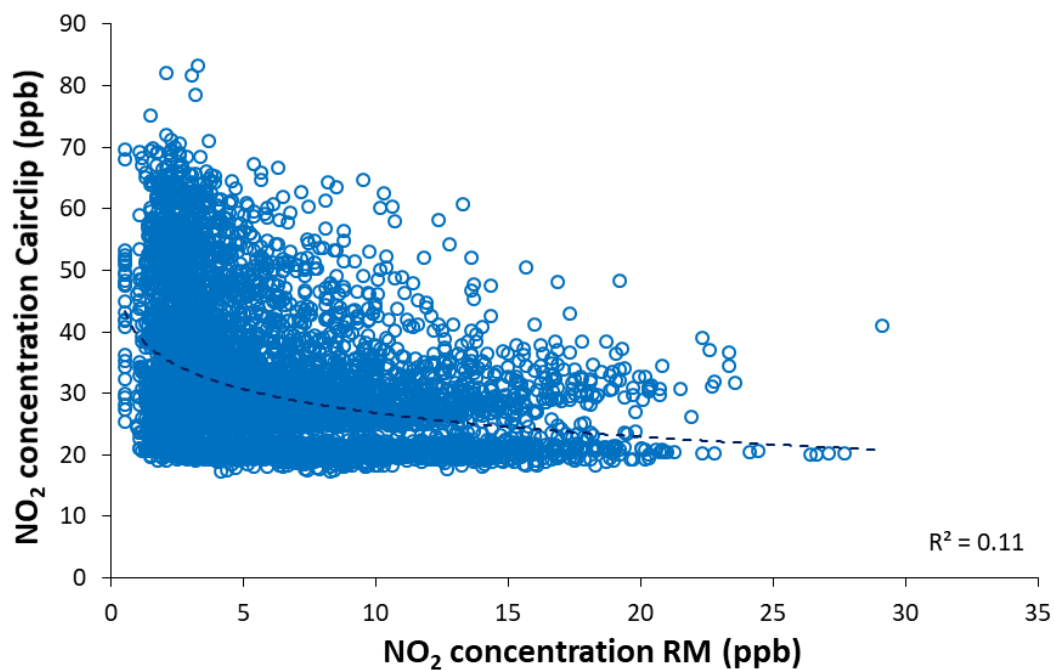

**Figure S6.** The negative relationship between NO<sub>2</sub> concentrations measured by Caiclip sensors and by RM. Coefficient of determination ( $R^2$ ) was estimated from logarithmic best-fit regression line.

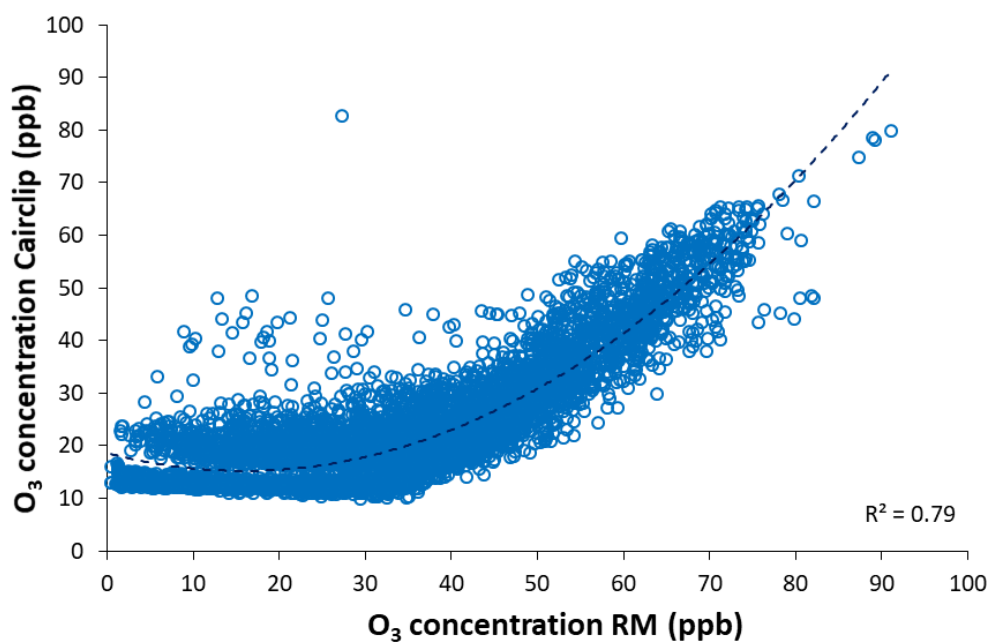

**Figure S7.** The relationship between O<sub>3</sub> concentrations measured by Caiclip sensors and by RM. Coefficient of determination ( $R^2$ ) was estimated from polynomial best-fit regression line (degree = 2).

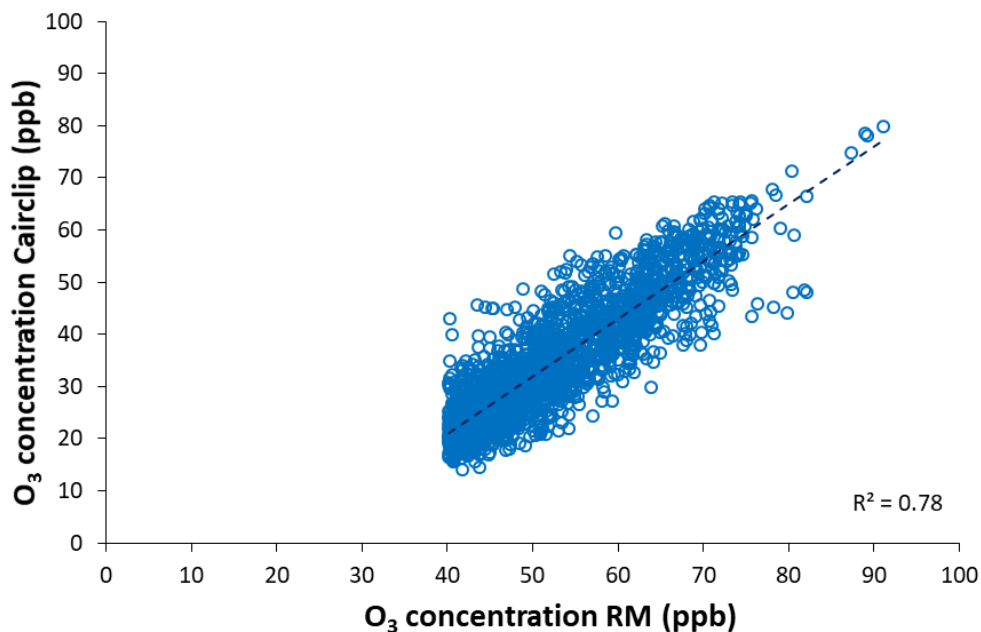

**Figure S8.** The relationship between O<sub>3</sub> concentrations measured by Cairclip sensors and by RM, while the O<sub>3</sub> concentrations measured by RM were limited to values higher than 40 ppb. Coefficient of determination ( $R^2$ ) was estimated from linear best-fit regression line.

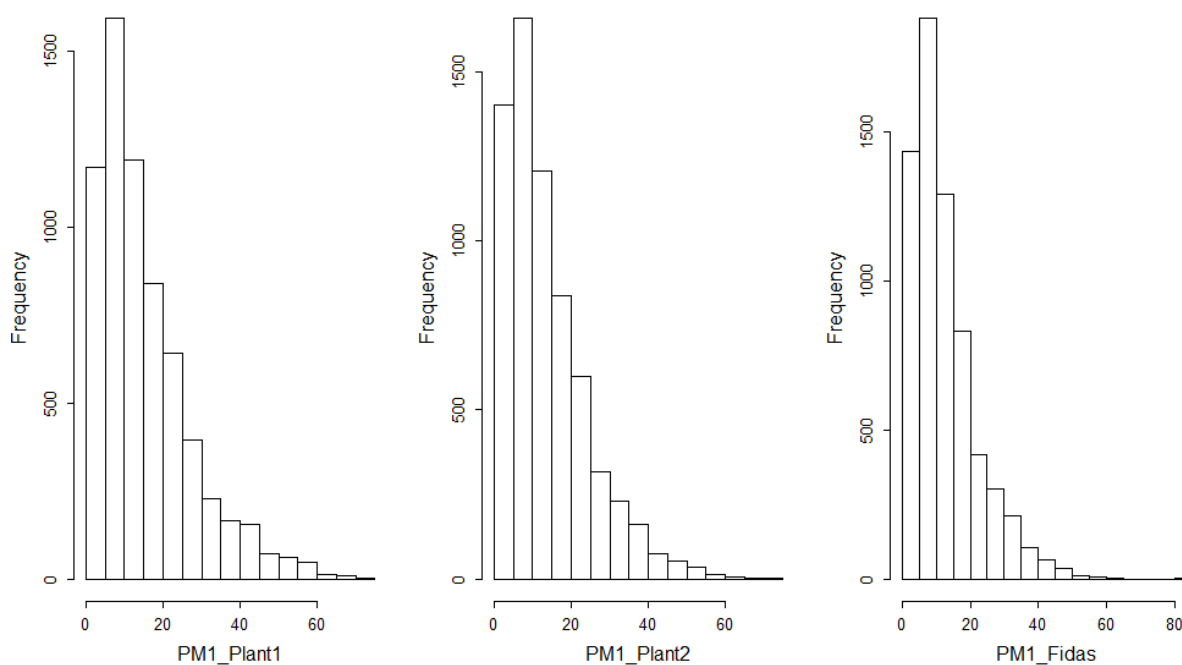

**Figure S9.** Histograms of PM<sub>1</sub> concentrations ( $\mu\text{g}/\text{m}^3$ ) measured by PMS7003 Plantower particle counters (Plant1, Plant2) and by equivalent optical Fidas200 monitor (Fidas).

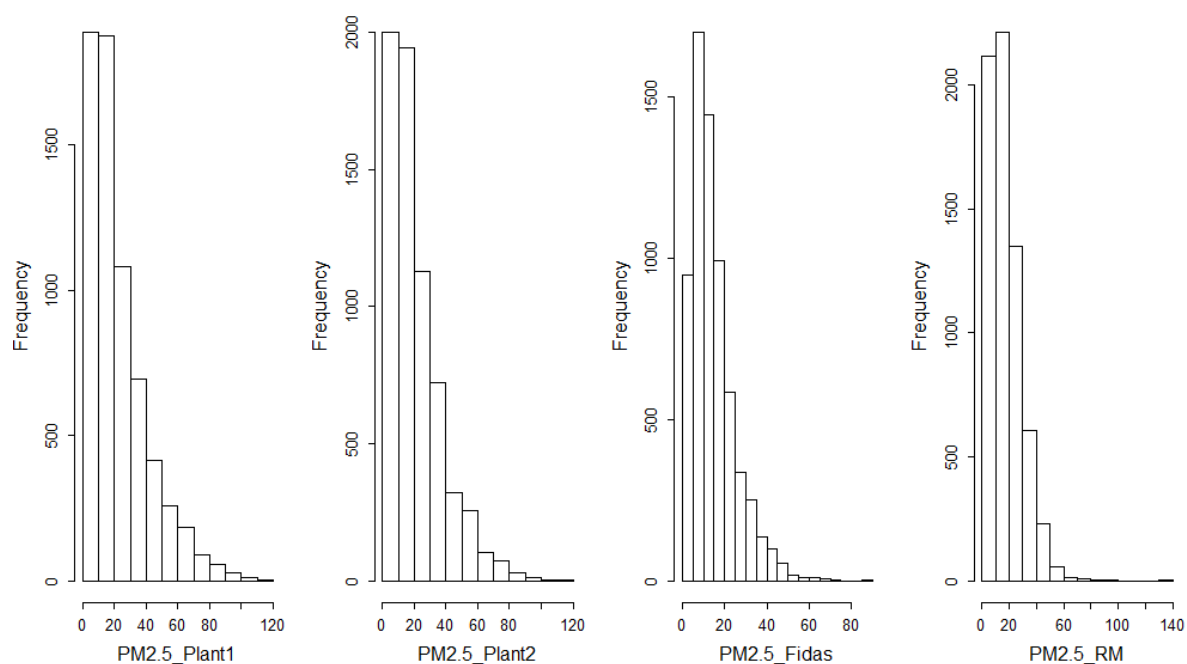

**Figure S10.** Histograms of PM<sub>2.5</sub> concentrations (µg/m<sup>3</sup>) measured by PMS7003 Plantower particle counters (Plant1, Plant2), by equivalent optical Fidas200 monitor (Fidas) and by radiometric RM (RM).

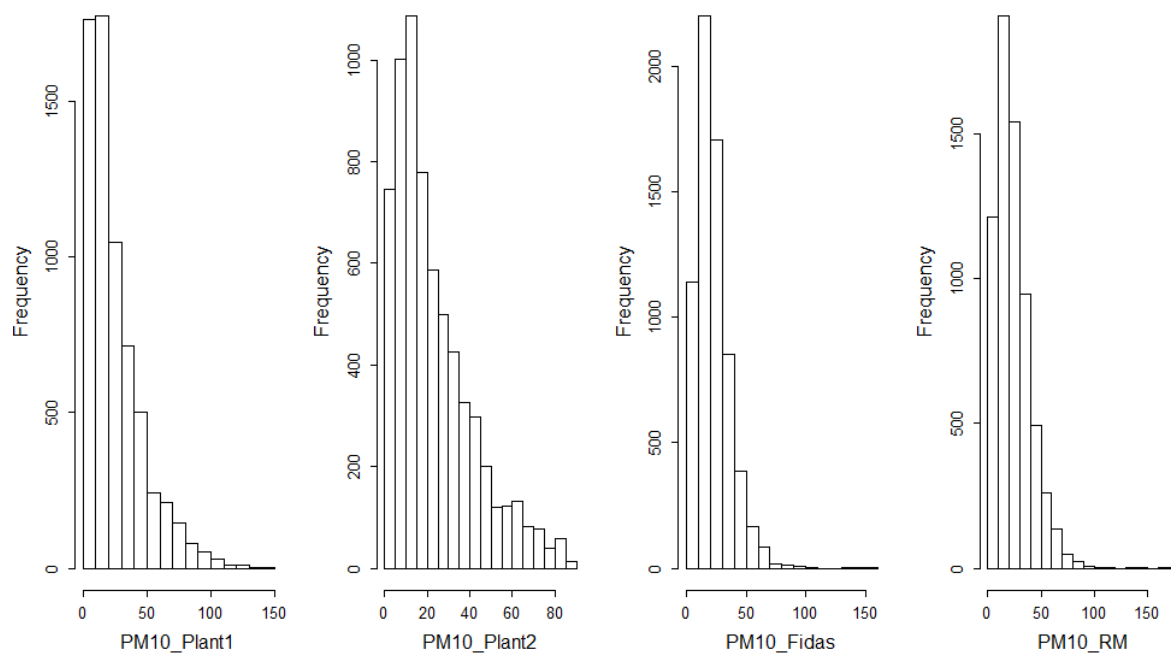



**Figure S11.** Histograms of PM<sub>10</sub> concentrations (µg/m<sup>3</sup>) measured by PMS7003 Plantower particle counters (Plant1, Plant2), by equivalent optical Fidas200 monitor (Fidas) and by radiometric RM (RM).

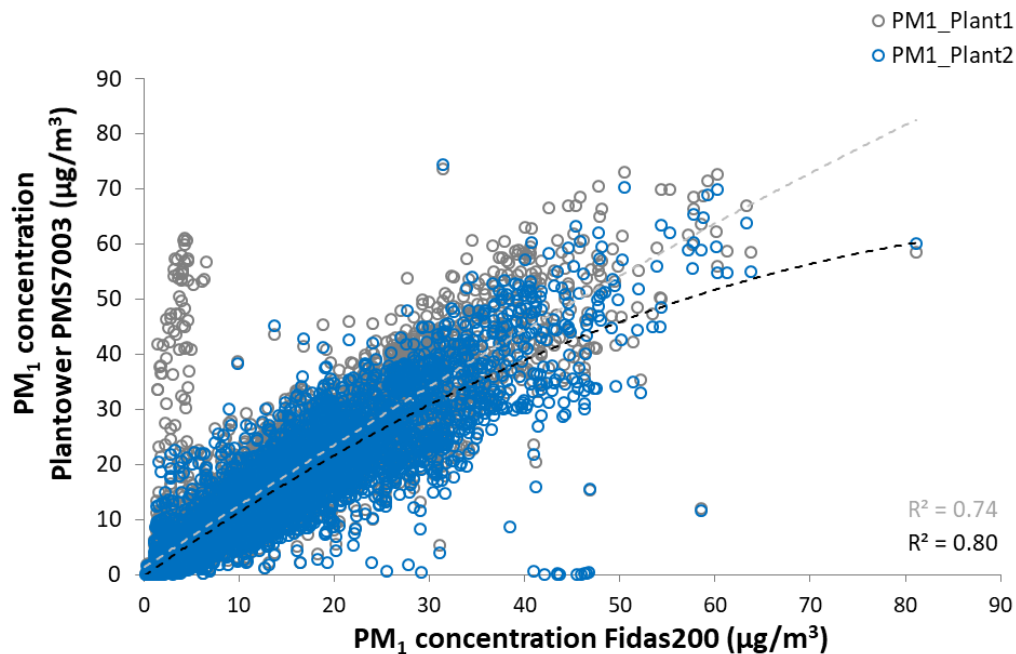

**Figure S12.** The relationship between PM<sub>1</sub> concentrations (µg/m<sup>3</sup>) measured by Plantower PMS7003 particle counters (Plant1 in grey, Plant2 in blue) and by equivalent optical Fidas200 monitor. Coefficients of determination (R<sup>2</sup>) were estimated from linear best-fit regression lines.

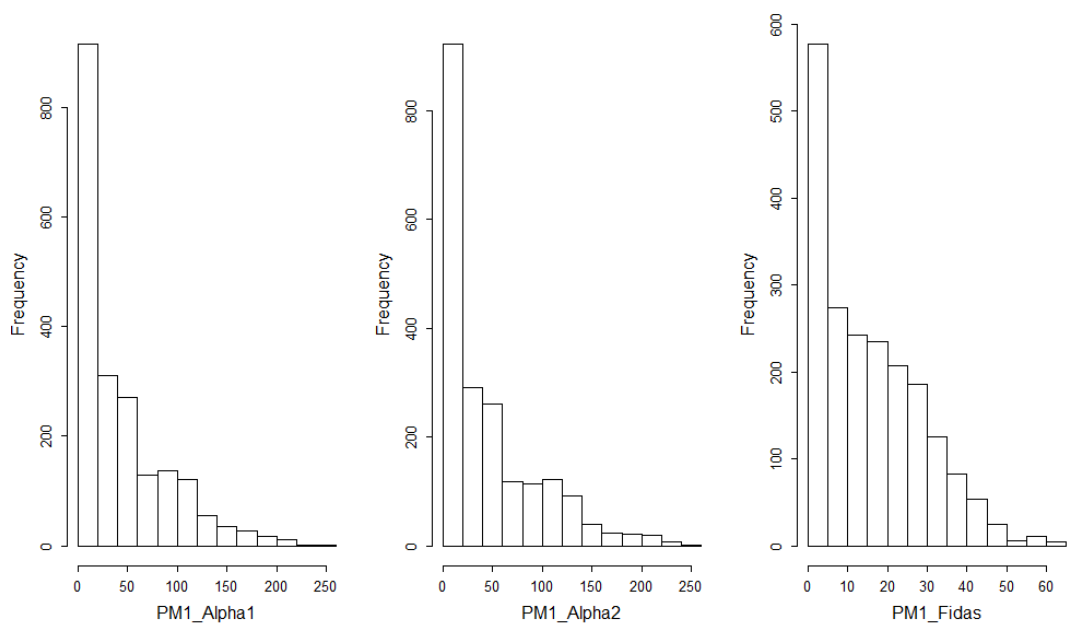

**Figure S13.** Histograms of PM<sub>1</sub> concentrations ( $\mu\text{g}/\text{m}^3$ ) measured by OPC-N2 Alphasense particle counters (Alpha1, Alpha2) and by equivalent optical Fidas200 monitor (Fidas).

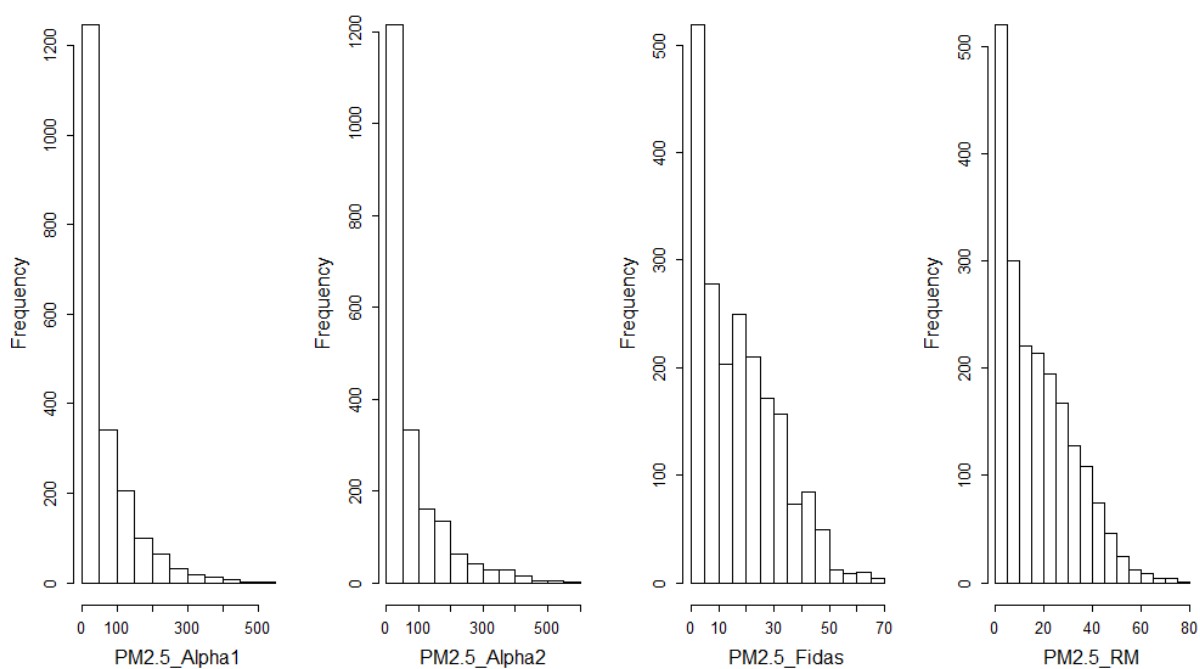

**Figure S14.** Histograms of PM<sub>2.5</sub> concentrations ( $\mu\text{g}/\text{m}^3$ ) measured by OPC-N2 Alphasense particle counters (Alpha1, Alpha2), by equivalent optical Fidas200 monitor (Fidas) and by radiometric RM (RM).

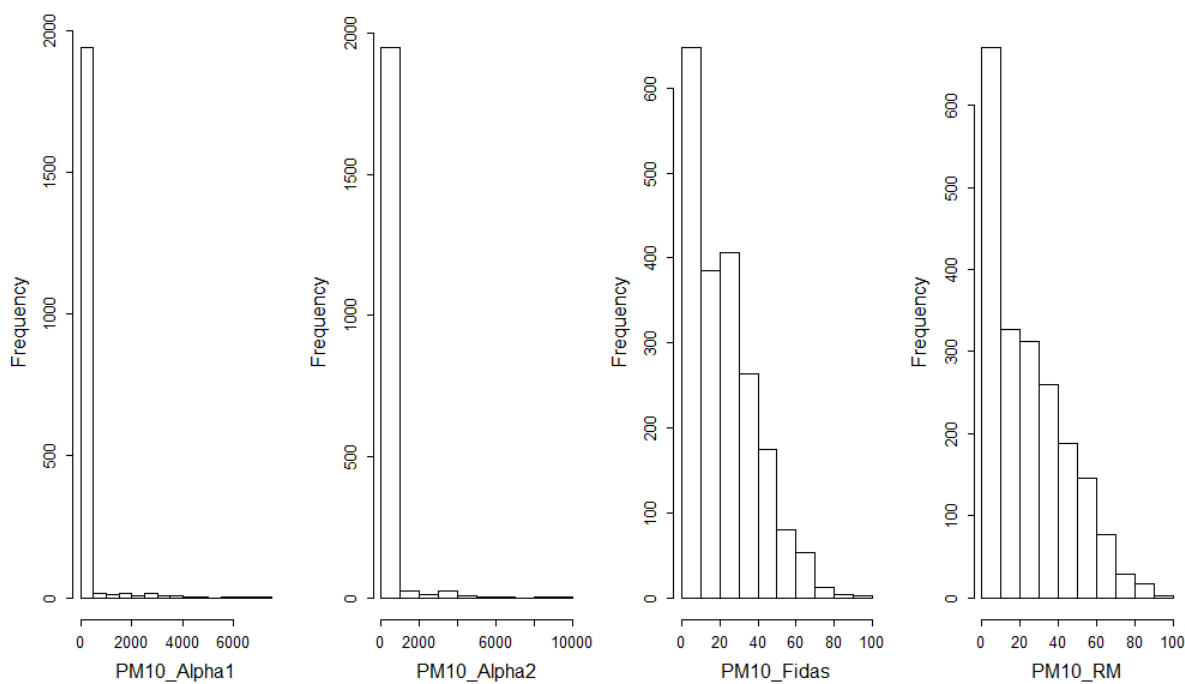

**Figure S15.** Histograms of PM<sub>10</sub> concentrations ( $\mu\text{g}/\text{m}^3$ ) measured by OPC-N2 Alphasense particle counters (Alpha1, Alpha2), by equivalent optical Fidas200 monitor (Fidas) and by radiometric RM (RM).

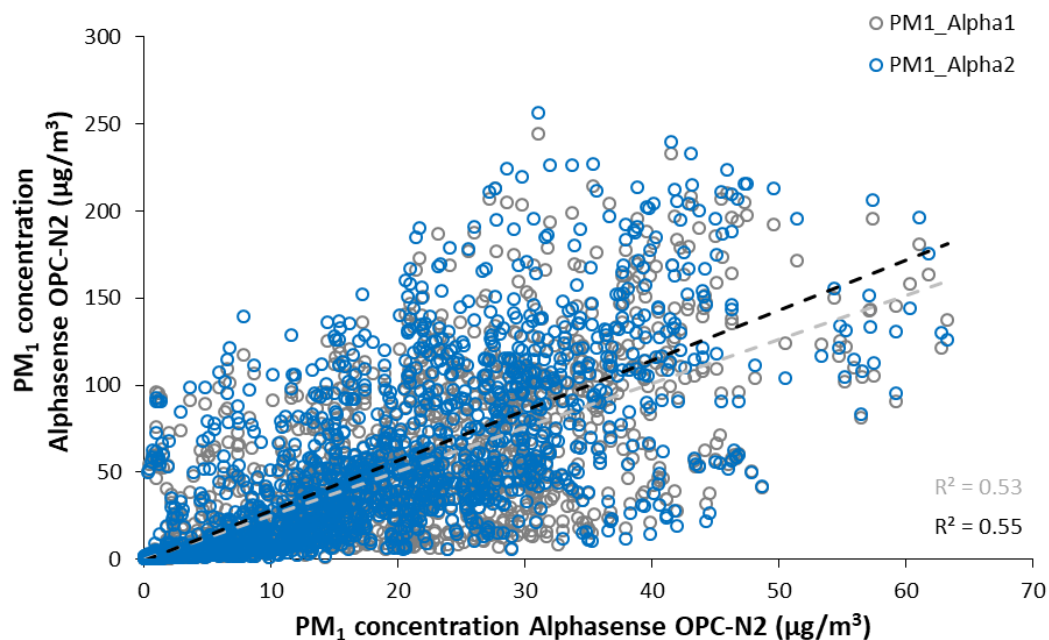

**Figure S16.** The relationship between PM<sub>1</sub> concentrations ( $\mu\text{g}/\text{m}^3$ ) measured by Alphasense OPC-N2 particle counters (Alpha1 in grey, Alpha2 in blue) and by equivalent optical Fidas200 monitor. Coefficients of determination ( $R^2$ ) were estimated from linear best-fit regression lines.

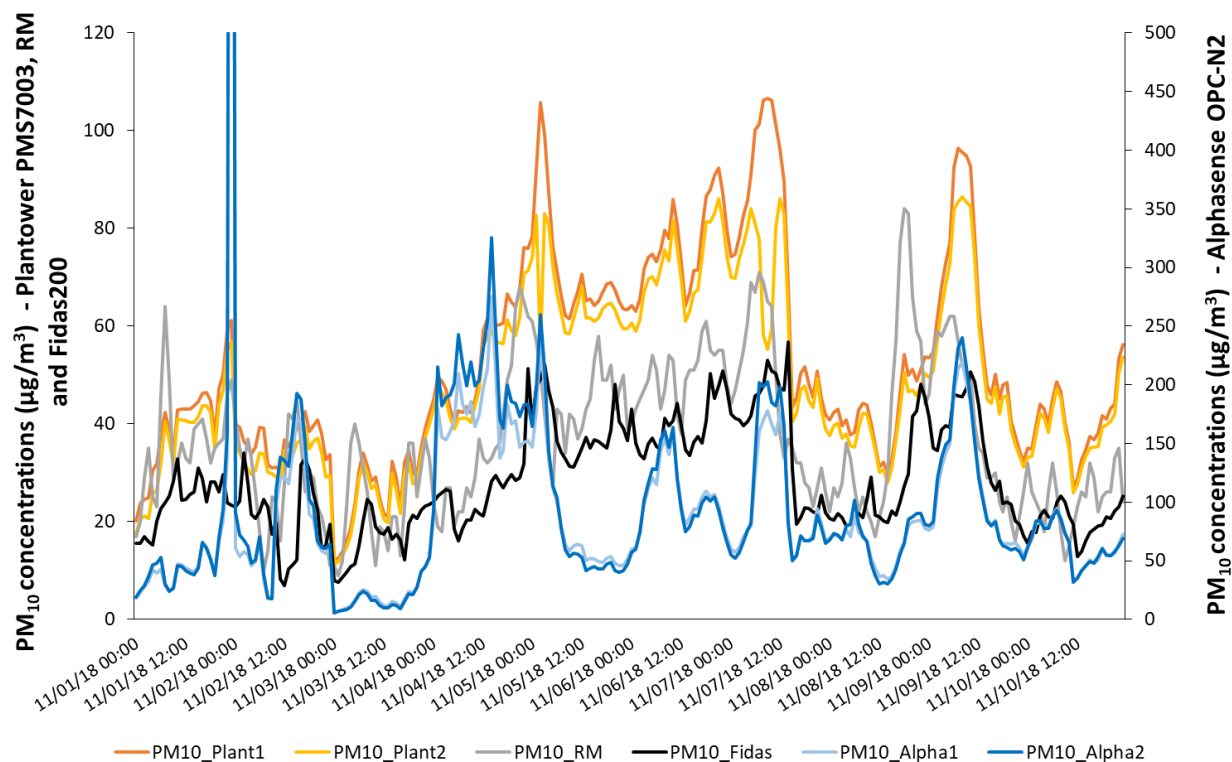

**Figure S17.** The course of hourly PM<sub>10</sub> concentrations (µg/m<sup>3</sup>) measured by Plantower and Alphasense particle counters in comparison with RM and Fidas200 monitor during the selected part of testing period (from November 1 until November 10, 2018). Mass concentrations measured by Alphasense sensors are displayed on the secondary y axis (on the right). Given the presence of extreme outliers the scale of the axis was intentionally limited (only up to 500 µg/m<sup>3</sup>).
